# Supplementary material for: What Do Germans Want to Know About Skin Cancer? A Nationwide Google Search Analysis From 2013 to 2017
Source: PubMed Central journal article supplement (PMC5956155; doi:10.2196/10327), 2018-05-02
Supplement: jmir_v20i5e10327_app1.pdf [file jmir_v20i5e10327_app1.pdf]

|    | Search term                         |
|----|-------------------------------------|
| 1  | Hautkrebs                           |
| 2  | Weißer Hautkrebs                    |
| 3  | Basaliom                            |
| 4  | Melanom                             |
| 5  | Schwarzer Hautkrebs                 |
| 6  | Aktinische Keratose                 |
| 7  | Plattenepithelkarzinom              |
| 8  | Hautkrebs Bilder                    |
| 9  | Malignes Melanom                    |
| 10 | Basalzellkarzinom                   |
| 11 | Weißer Hautkrebs Bilder             |
| 12 | Hautkrebs Symptome                  |
| 13 | Hautveränderungen                   |
| 14 | Spinaliom                           |
| 15 | Morbus bowen                        |
| 16 | Hautkrebsscreening                  |
| 17 | Hautkrebs Anzeichen                 |
| 18 | Keratose                            |
| 19 | Hautkrebs erkennen                  |
| 20 | Heller Hautkrebs                    |
| 21 | Hautkrebsvorsorge                   |
| 22 | Basaliom Bilder                     |
| 23 | Schwarzer Hautkrebs Bilder          |
| 24 | Wie sieht Hautkrebs aus             |
| 25 | Melanom Bilder                      |
| 26 | Symptome Hautkrebs                  |
| 27 | Hauttumor                           |
| 28 | Aktinische Keratose Bilder          |
| 29 | Hautkrebsarten                      |
| 30 | Weißer Krebs                        |
| 31 | Hautkrebs weiß                      |
| 32 | Weißer Hautkrebs Symptome           |
| 33 | Hautkrebs Anfangsstadium            |
| 34 | Hautkrebs Behandlung                |
| 35 | Stachelzellkrebs                    |
| 36 | Weißer Hautkrebs Fotos              |
| 37 | Schwarzes Muttermal                 |
| 38 | Bilder Hautkrebs                    |
| 39 | Spinozelluläres Karzinom            |
| 40 | Basaliom Nase                       |
| 41 | Weißer Hautkrebs Aussehen           |
| 42 | Weißer Hautkrebs Anfangsstadium     |
| 43 | Keratosen                           |
| 44 | Bilder weißer Hautkrebs             |
| 45 | Weiser Hautkrebs                    |
| 46 | Schwarzer Hautkrebs Lebenserwartung |
| 47 | Melanome                            |
| 48 | Weißer Hautkrebs Behandlung         |
| 49 | Noduläres Melanom                   |
| 50 | Hautkrebs Muttermal                 |
